# Supplementary material for: Persisting Chemosensory Impairments in 366 Healthcare Workers Following COVID-19: An 11-Month Follow-up
Source: bioRxiv or medRxiv preprint supplement (doi:10.1101/2021.12.20.21268066), 2021-12-27
Supplement: Supplementary file [file media-1.pdf]

Supplementary file 1:

**Subjective Chemosensory Dysfunction Questionnaire (SCD-Q, T3)**

|    |                                                                                                                                                                                                                                                                                                                                                                                           |
|----|-------------------------------------------------------------------------------------------------------------------------------------------------------------------------------------------------------------------------------------------------------------------------------------------------------------------------------------------------------------------------------------------|
| D1 | <p>Hello,</p> <p>Thank you for agreeing to continue this study with us.</p> <p>We offer you a 35 minutes ONLINE QUESTIONNAIRE including a behavioral olfactory test. This AT-HOME SCENT TEST involves smelling and tasting a variety of <u>common substances found in your kitchen</u> to establish your odor detection threshold.</p>                                                    |
| D2 | <p><b>Please prepare peanut butter, jam or jelly, vinegar, coffee, salt and sugar if you have any.</b></p> <p><b>You will need these ingredients for the last section of the survey.</b></p>                                                                                                                                                                                              |
| Q1 | <p><b>Please select the category that best describes you?</b></p> <p>Caucasian (White)<br/> Indigenous (First Nations, Inuit, Metis)<br/> Asian<br/> Black<br/> Latin-American<br/> Arab<br/> Other [text box]<br/> Prefer not to answer</p>                                                                                                                                              |
| Q2 | <p>Have you been <u>reinfecte</u>d with COVID-19?</p> <p>-Yes</p> <p>-No</p>                                                                                                                                                                                                                                                                                                              |
| Q3 | <p>Were you diagnosed with any <u>other respiratory illnesses (not COVID-19)</u> in the <u>last two weeks</u>? (Select all that apply)</p> <ul style="list-style-type: none"> <li>- Strep throat (Streptococcal bacteria)</li> <li>- Another bacterial illness</li> <li>- Flu (influenza)</li> <li>- Another viral illness</li> <li>- Other</li> <li>- <b>None [Exclusive]</b></li> </ul> |
| Q4 | <p>Have you had any of the following symptoms with your <b>recent respiratory illness or diagnosis (NOT COVID)</b> (Select all that</p>                                                                                                                                                                                                                                                   |

|    |                                                                                                                                                                                                                                                                                                                                                                                                                                                                                                                                                                                                                                                                                                     |
|----|-----------------------------------------------------------------------------------------------------------------------------------------------------------------------------------------------------------------------------------------------------------------------------------------------------------------------------------------------------------------------------------------------------------------------------------------------------------------------------------------------------------------------------------------------------------------------------------------------------------------------------------------------------------------------------------------------------|
|    | <p>apply)</p> <ul style="list-style-type: none"> <li>- Fever</li> <li>- Dry cough</li> <li>- Cough with mucus</li> <li>- Difficulty breathing / shortness of breath</li> <li>- Chest tightness</li> <li>- Runny nose</li> <li>- Sore throat</li> <li>- Changes in food flavor</li> <li>- Changes in smell</li> <li>- Loss of appetite</li> <li>- Headache</li> <li>- Muscle aches</li> <li>- Fatigue</li> <li>- Diarrhea</li> <li>- Abdominal pain</li> <li>- Nausea</li> <li>- No symptoms <b>[Exclusive]</b></li> </ul>                                                                                                                                                                           |
| Q5 | <p>What treatment(s) or medication(s) have you received for your recent respiratory illness or diagnosis (NOT COVID)?</p> <ul style="list-style-type: none"> <li>- <b>[text box]</b></li> <li>- None</li> </ul>                                                                                                                                                                                                                                                                                                                                                                                                                                                                                     |
| D3 | <b>The next question relates to your pre-existing medical conditions.</b>                                                                                                                                                                                                                                                                                                                                                                                                                                                                                                                                                                                                                           |
| Q6 | <p>Have you been treated or diagnosed for any of the following?<br/>(Select all that apply)</p> <ul style="list-style-type: none"> <li>- High blood pressure</li> <li>- Heart disease (heart attack or stroke)</li> <li>- Diabetes (high blood sugar)</li> <li>- Obesity</li> <li>- Lung disease (asthma/chronic bronchitis)</li> <li>- Head trauma</li> <li>- Neurological disease</li> <li>- Cancer that required chemotherapy or radiation</li> <li>- Cancer that did NOT require chemotherapy or radiation</li> <li>- Chronic sinus disease</li> <li>- Seasonal allergies / hay fever</li> <li>- Other [text box]</li> <li>- None <b>[Exclusive]</b></li> <li>- Prefer not to answer</li> </ul> |
| D5 | <b>The following questions relate to your <u>sense of smell</u> (for example, sniffing flowers or soap, or smelling garbage) but <u>not the flavor of food</u> in your mouth.</b>                                                                                                                                                                                                                                                                                                                                                                                                                                                                                                                   |
| Q7 | Rate your ability to <u>smell</u> BEFORE the COVID-19 pandemic.                                                                                                                                                                                                                                                                                                                                                                                                                                                                                                                                                                                                                                     |

|     |                                                                                                                                                                                                                                                                                                                                                                                                                                                                                                                         |
|-----|-------------------------------------------------------------------------------------------------------------------------------------------------------------------------------------------------------------------------------------------------------------------------------------------------------------------------------------------------------------------------------------------------------------------------------------------------------------------------------------------------------------------------|
|     | 0: No sense of smell ...<br>10: Excellent sense of smell                                                                                                                                                                                                                                                                                                                                                                                                                                                                |
| Q8  | Rate your ability to <u>smell</u> DURING your most recent <b>COVID-19 infection or diagnosis</b> .<br><br>0: No sense of smell ...<br>10: Excellent sense of smell                                                                                                                                                                                                                                                                                                                                                      |
| Q9  | Rate your ability to <u>smell</u> TODAY.<br><br>0: No sense of smell ...<br>10: Excellent sense of smell                                                                                                                                                                                                                                                                                                                                                                                                                |
| Q10 | Rate your ability to <u>smell</u> TODAY.<br><br>0: No sense of smell ...<br>10: Excellent sense of smell                                                                                                                                                                                                                                                                                                                                                                                                                |
| Q11 | Rate your ability to <u>smell</u> when you answered our first questionnaire.<br><br>0: No sense of smell ...<br>10: Excellent sense of smell<br>Don't remember                                                                                                                                                                                                                                                                                                                                                          |
| Q12 | Rate your ability to <u>smell</u> COMPARED to the time before the COVID-19 pandemic.<br><br>Much worse<br>A bit worse<br>The same ( <b>skip to D7</b> )<br>A bit better<br>Much better                                                                                                                                                                                                                                                                                                                                  |
| Q13 | Do you currently experience any changes in your sense of smell? (Select all that apply)<br>- I cannot smell at all / Smells smell less strong than they did before<br>- Smells smell different than they did before (the quality of smell has changed)<br>- I can smell things that aren't there (for example I smell burning when nothing is on fire)<br>- Sense of smell fluctuates (comes and goes)<br>- Other or details to answers selected above [ <b>text box</b> ]<br>- No changes noticed ( <b>Exclusive</b> ) |
| D4  | <b>The next questions should be answered spontaneously.</b><br><b>We will ask you to select one of these 4 answers regarding various statements:</b>                                                                                                                                                                                                                                                                                                                                                                    |

|     |                                                                                                                                                                                                                       |
|-----|-----------------------------------------------------------------------------------------------------------------------------------------------------------------------------------------------------------------------|
|     | <p>Completely agree</p> <p>Partially agree</p> <p>Partially disagree</p> <p>Completely Disagree</p>                                                                                                                   |
| Q14 | <p>The changes in my sense of smell make me feel isolated.</p> <p>Completely agree</p> <p>Partially agree</p> <p>Partially disagree</p> <p>Completely disagree</p>                                                    |
| Q15 | <p>Because of the changes in my sense of smell, I have problems with taking part in activities of daily life.</p> <p>Completely agree</p> <p>Partially agree</p> <p>Partially disagree</p> <p>Completely Disagree</p> |
| Q16 | <p>The changes in my sense of smell make me feel angry.</p> <p>Completely agree</p> <p>Partially agree</p> <p>Partially disagree</p> <p>Completely disagree</p>                                                       |
| Q17 | <p>Because of the changes in my sense of smell, I don't enjoy drinks or food as much as I used to.</p> <p>Completely agree</p> <p>Partially agree</p> <p>Partially disagree</p> <p>Completely disagree</p>            |
| Q18 | <p>Because of the changes in my sense of smell, I eat less than I used to or more than I used to.</p> <p>Completely agree</p> <p>Partially agree</p> <p>Partially disagree</p> <p>Completely disagree</p>             |
| Q19 | <p>Because of the changes in my sense of smell, I try harder to relax.</p> <p>Completely agree</p> <p>Partially agree</p> <p>Partially disagree</p> <p>Completely disagree</p>                                        |
| Q20 | <p>I am worried that I will never get used to the changes in my sense</p>                                                                                                                                             |

|           |                                                                                                                                                                                                                       |
|-----------|-----------------------------------------------------------------------------------------------------------------------------------------------------------------------------------------------------------------------|
|           | <p>of smell.</p> <p>Completely agree<br/>Partially agree<br/>Partially disagree<br/>Completely disagree</p>                                                                                                           |
| <b>D5</b> | <b>The following questions relate to the obstruction or congestion of your nose (stuffy nose).</b>                                                                                                                    |
| Q21       | <p>How <b><u>blocked</u></b> was your nose BEFORE the COVID-19 pandemic?</p> <p>0: Not at all blocked ...<br/>10: Completely blocked</p>                                                                              |
| Q22       | <p>How <b><u>blocked</u></b> was your nose DURING your most recent <b>COVID-19 infection or diagnosis</b>?</p> <p>0: Not at all blocked ...<br/>10: Completely blocked</p>                                            |
| Q23       | <p>How <b><u>congested or clogged</u></b> is your nose TODAY?</p> <p>0: Not blocked at all ...<br/>10: completely blocked</p>                                                                                         |
| Q24       | <p>How <b><u>congested or clogged</u></b> was your nose when you answered our first survey?</p> <p>0: Not blocked at all ...<br/>10: completely blocked<br/>Don't remember</p>                                        |
| Q25       | <p>Rate how <b><u>congested or clogged</u></b> your nose is COMPARED to the time before your infection.</p> <p>Much more blocked<br/>A bit more blocked<br/>The same<br/>A bit less blocked<br/>Much less blocked</p> |
| <b>D6</b> | <b>The following questions are related to your sense of taste. For example, sweetness, sourness, saltiness, bitterness experienced in the mouth.</b>                                                                  |
| Q26       | <p>Rate your ability to <b><u>taste</u></b> BEFORE the COVID-19 pandemic.</p> <p>0: No sense of taste ...<br/>10: Excellent sense of taste</p>                                                                        |
| Q27       | <p>Rate your ability to <b><u>taste</u></b> DURING your most recent <b>COVID-19 infection or diagnosis</b>.</p>                                                                                                       |

|     |                                                                                                                                                                                                                                                                                                                                                                                                                                                                                                       |
|-----|-------------------------------------------------------------------------------------------------------------------------------------------------------------------------------------------------------------------------------------------------------------------------------------------------------------------------------------------------------------------------------------------------------------------------------------------------------------------------------------------------------|
|     | 0: No sense of taste ...<br>10: Excellent sense of taste                                                                                                                                                                                                                                                                                                                                                                                                                                              |
| Q28 | Rate your ability to <b><u>taste</u></b> TODAY.<br><br>0: No sense of taste<br>10: excellent sense of taste                                                                                                                                                                                                                                                                                                                                                                                           |
| Q29 | Rate your ability to <b><u>taste</u></b> when you answered our first questionnaire.<br><br>0: No sense of taste ...<br>10: Excellent sense of taste<br>Don't remember                                                                                                                                                                                                                                                                                                                                 |
| Q30 | Rate your ability to <b><u>taste</u></b> COMPARED to the time before your infection.<br><br>Much worse<br>A bit worse<br>The same<br>A bit better<br>Much better                                                                                                                                                                                                                                                                                                                                      |
| Q31 | Do you currently experience changes with your sense of taste?<br>(Select all that apply)<br>- Sweet (Sugar, caramel, candy, etc.)<br>- Salty (Salt, sea water, smoked or cured meat, etc.)<br>- Sour (Yellow lemon, plain yogurt, etc.)<br>- Bitter (white skin on grapefruit, raw endives, coffee, etc.)<br>- Savory/Umami (ripe tomatoes, soy sauce, parmesan, or cheddar cheese, etc.)<br>- Other or details to answers selected above <b>[text box]</b><br>- No change noticed <b>[Exclusive]</b> |
| D7  | <b>The following questions are related to other sensations in your mouth, like burning, cooling, or tingling. For example, chili peppers, mint gum or candy, or carbonation.</b>                                                                                                                                                                                                                                                                                                                      |
| Q32 | Rate your <b><u>ability to feel these other sensations</u></b> (burning, cooling, or tingling) BEFORE the COVID-19 pandemic.<br><br>0: Not sensitive at all...<br>10: Very sensitive                                                                                                                                                                                                                                                                                                                  |
| Q33 | Rate your <b><u>ability to feel these other sensations</u></b> (burning, cooling, or tingling) DURING your most recent COVID-19 infection or diagnosis.<br><br>0: Not sensitive at all...<br>10: Very sensitive                                                                                                                                                                                                                                                                                       |

|     |                                                                                                                                                                                                                                                                                                                                                                                                         |
|-----|---------------------------------------------------------------------------------------------------------------------------------------------------------------------------------------------------------------------------------------------------------------------------------------------------------------------------------------------------------------------------------------------------------|
| Q34 | <p>Rate your <u>ability to feel other sensations like burning, cooling, and tingling</u> AFTER acute symptoms.</p> <p>0: No perception at all...<br/>10: very sensitive</p>                                                                                                                                                                                                                             |
| Q35 | <p>Rate your <u>ability to feel other sensations like burning, cooling, and tingling</u> TODAY.</p> <p>0: No perception at all...<br/>10: very sensitive</p>                                                                                                                                                                                                                                            |
| Q36 | <p>Rate your ability to <u>ability to feel other sensations like burning, cooling, and tingling</u> when you answered our first questionnaire.</p> <p>0: No perception at all...<br/>10: very sensitive</p>                                                                                                                                                                                             |
| Q37 | <p>Rate your <u>ability to feel other sensations like burning, cooling, and tingling</u> COMPARED to the time before your infection.</p> <p>Much worse<br/>A bit worse<br/>The same<br/>A bit better<br/>Much better</p>                                                                                                                                                                                |
| Q38 | <p>Think about a food or beverage you consume regularly - for example, your morning coffee or tea or a piece of fruit you have each day.</p> <p>Has the taste, smell, or flavor changed and not recuperated since your <b>COVID-19 infection</b> or diagnosis? If so, <b>please describe how and be sure to indicate which food or beverage you are describing.</b></p> <p>[text box]<br/>No change</p> |
| D8  | <p><b>For the next section, please provide yourself these items from your kitchen:</b></p> <ul style="list-style-type: none"> <li>• Peanut butter</li> <li>• Fruit jam or jelly (Room temperature)</li> <li>• Vinegar</li> <li>• Coffee (beans, ground, instant, other)</li> <li>• Salt</li> <li>• Sugar</li> </ul> <p><b>2 glasses of lukewarm water</b></p>                                           |
| Q39 | <p>Do you have peanut butter?</p> <p>Yes<br/>No/I'm allergic (<b>Skip to Q43</b>)</p>                                                                                                                                                                                                                                                                                                                   |

|     |                                                                                                                                                          |
|-----|----------------------------------------------------------------------------------------------------------------------------------------------------------|
| Q40 | <p>Please <b>sniff</b> the peanut butter</p> <p>How strong does the peanut butter smell?</p> <p>0: Not at all<br/>10: Very strong</p>                    |
| Q41 | <p>Is the peanut butter smell the same as usual?</p> <p>Yes<br/>No, weaker<br/>No, different</p>                                                         |
| Q42 | <p>Without knowing the substance you are going to smell, do you believe you would have recognized the smell of peanut butter?</p> <p>Yes<br/>No</p>      |
| Q43 | <p>Do you have fruit jam or jelly?</p> <p>Yes<br/>No <b>(Skip to Q47)</b></p>                                                                            |
| Q44 | <p>Please <b>sniff</b> the fruit jam or jelly.</p> <p>How strong does the fruit jam or jelly smell?</p> <p>0: Not at all<br/>10: Very strong</p>         |
| Q45 | <p>Is the fruit jam or jelly smell the same as usual?</p> <p>Yes<br/>No, weaker<br/>No, different</p>                                                    |
| Q46 | <p>Without knowing the substance you are going to smell, do you believe you would have recognized the smell of fruit jam or jelly?</p> <p>Yes<br/>No</p> |
| Q47 | <p>Do you have vinegar?</p> <p>Yes<br/>No <b>(Skip to Q51)</b></p>                                                                                       |
| Q48 | <p>Please <b>sniff</b> the <b>vinegar</b></p> <p>How strong does the vinegar smell?</p> <p>0: Not at all<br/>10: Very strong</p>                         |
| Q49 | <p>Is the vinegar smell the same as usual?</p>                                                                                                           |



|     |                                                                                                                                                               |
|-----|---------------------------------------------------------------------------------------------------------------------------------------------------------------|
|     | Yes<br>No, weaker<br>No, different                                                                                                                            |
| Q50 | Without knowing the substance you are going to smell, do you believe you would have recognized the smell of vinegar?<br><br>Yes<br>No                         |
| Q51 | Do you have coffee (beans, ground, instant, other)?<br><br>Yes<br>No ( <b><u>skip to D9</u></b> )                                                             |
| Q52 | Please <b>sniff</b> the <b>coffee</b> (beans, ground, instant, other)<br><br>How strong does the coffee powder smell?<br><br>0: Not at all<br>10: Very strong |
| Q53 | Is the coffee smell the same as usual?<br><br>Yes<br>No, weaker<br>No, different                                                                              |
| Q54 | Without knowing the substance you are going to smell, do you believe you would have recognized the smell of coffee?<br><br>Yes<br>No                          |
| D9  | <b>Let's proceed to the tasting section of the test.</b><br><br><b>(Exclude Q55-57 if no PB and exclude Q58-60 if no jam/jelly)</b>                           |
| Q55 | Please put a small amount of <b>peanut butter</b> in your mouth. How strong does the peanut butter <b>taste</b> ?<br><br>0: Not at all<br>10: Very strong     |
| Q56 | Does the peanut butter taste the same as usual?<br><br>Yes<br>No, weaker<br>No, different                                                                     |
| Q57 | Without knowing the substance you are going to taste, do you believe you would have recognized the taste of peanut butter?<br><br>Yes                         |

|     |                                                                                                                                                                                                                                                  |
|-----|--------------------------------------------------------------------------------------------------------------------------------------------------------------------------------------------------------------------------------------------------|
|     | No                                                                                                                                                                                                                                               |
| Q58 | <p>Please put a small amount of <b>fruit jam or jelly</b> in your mouth. How strong does the fruit jam or jelly <b>taste</b>?</p> <p>0: Not at all<br/>10: Very strong</p>                                                                       |
| Q59 | <p>Does the fruit jam or jelly taste the same as usual?</p> <p>Yes<br/>No, weaker<br/>No, different</p>                                                                                                                                          |
| Q60 | <p>Without knowing the substance you are going to taste, do you believe you would have recognized the taste of fruit jam or jelly?</p> <p>Yes<br/>No</p>                                                                                         |
| Q61 | <p>Do you have salt?</p> <p>Yes<br/>No <b>(Skip to Q65)</b></p>                                                                                                                                                                                  |
| Q62 | <p>Please put a teaspoon of <b>salt</b> into a glass filled with 1 cup of lukewarm water. Stir. Then please take a spoonful of water into your mouth. How strong does the salty water <b>taste</b>?</p> <p>0: Not at all<br/>10: Very strong</p> |
| Q63 | <p>Is the salty taste the same as usual?</p> <p>Yes<br/>No, weaker<br/>No, different</p>                                                                                                                                                         |
| Q64 | <p>Without knowing the substance you are going to taste, do you believe you would have recognized the salty taste?</p> <p>Yes<br/>No</p>                                                                                                         |
| Q65 | <p>Do you have sugar?</p> <p>Yes<br/>No <b>(Skip to Q69)</b></p>                                                                                                                                                                                 |
| Q66 | <p>Please put 3 teaspoons of <b>sugar</b> into the other glass with 1 cup of lukewarm water. Stir. Then please take a spoonful of water into your mouth. How strong does the sweet water <b>taste</b>?</p>                                       |

|     |                                                                                                                                                                                                                           |
|-----|---------------------------------------------------------------------------------------------------------------------------------------------------------------------------------------------------------------------------|
|     | 0: Not at all<br>10: Very strong                                                                                                                                                                                          |
| Q67 | Is the sweet taste the same as usual?<br><br>Yes<br>No, weaker<br>No, different                                                                                                                                           |
| Q68 | Without knowing the substance you are going to taste, do you believe you would have recognized the sweet taste?<br><br>Yes<br>No                                                                                          |
| Q69 | Would you like to mention anything else regarding your medical condition, the evolution of your chemical senses (smell, taste, other sensations) or any other relevant information?<br><br>Yes [text box]<br>No           |
| D10 | Thank you for answering this second-and last online questionnaire!<br>Your contribution to our understanding of this new virus is greatly appreciated.<br><br>Cordially,<br><br>Dr Nicolas Dupré<br>Dr Johannes Frasnelli |
